# Supplementary material for: Ambiguous electrocatalytic CO2 reduction behaviour of a nickel bis(aldimino)pyridine pincer complex
Source: Royal Society of Chemistry journal article supplement (doi:10.1039/c6dt01872f), 2016-01-01
Supplement: c6dt01872f1.pdf [file c6dt01872f1.pdf]

# Ambiguous electrocatalytic CO<sub>2</sub> reduction behavior of a nickel bis(aldimino)pyridine pincer complex

## *Electronic Supplementary Information*

Remya Narayanan,<sup>a</sup> Meaghan McKinnon,<sup>a</sup> Blake R. Reed,<sup>b</sup> Ken T. Ngo,<sup>a</sup> Stanislav Groysman,<sup>b\*</sup>  
Jonathan Rochford<sup>a\*</sup>

<sup>a</sup>Department of Chemistry, University of Massachusetts Boston, 100 Morrissey Boulevard, Boston, MA  
02125. <sup>b</sup>Department of Chemistry, Wayne State University, Detroit, Michigan 48202, USA.

## Materials and Methods.

The complexes  $\text{Ni}(\text{NNN})\text{Cl}_2$  and  $\text{Ni}(\text{NNN})\text{Br}_2$  were synthesized as previously described.<sup>1</sup> Cyclic voltammetry was carried out on a CH Instruments 620E potentiostat. A custom three electrode cell was used for both CV and bulk electrolysis experiments allowing airtight introduction of working, counter and reference electrodes as well as septa for gas purging.

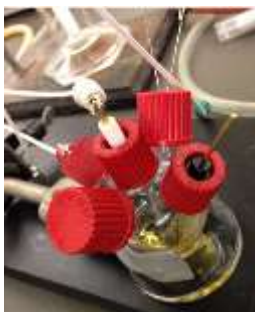

Gas cylinders were ordered from Airgas containing known ratios of Ar:CO<sub>2</sub> (100:0, 80:20, 60:40, 50:50, 40:60, 20:80, 0:100). For cyclic voltammetry, glassy carbon (3 mm diameter) and Pt wire were used as working and counter electrodes, respectively, with 0.1 M Bu<sub>4</sub>NPF<sub>6</sub> in spectrophotometric grade acetonitrile as the supporting electrolyte. A non-aqueous reference electrode was used to minimize ohmic potential drop at the solvent interface. This consisted of a Ag wire in 0.1 M Bu<sub>4</sub>NPF<sub>6</sub> acetonitrile supporting electrolyte isolated by a vycor frit and was calibrated using the ferrocenium/ferrocene redox couple as a pseudo reference (+0.45 V vs. SCE).<sup>2</sup> Redox potentials ( $E$ ) were determined from cyclic voltammetry as  $(E_{\text{pa}} + E_{\text{pc}})/2$ , where  $E_{\text{pa}}$  and  $E_{\text{pc}}$  are the anodic and cathodic peak potentials respectively. Where  $E$  could not be calculated due to irreversible behavior,  $E_{\text{pc}}$  or  $E_{\text{pa}}$  are reported accordingly. For controlled potential electrolysis experiments a vitreous carbon working electrode was used (soldered to a copper wire), a Pt gauze counter electrode was used isolated via a fine porosity vycor tube+frit to minimize mass transfer resistance. Gas chromatography data were recorded on a custom Shimadzu GC-2014 instrument where a Ni “methanizer” catalyst was used to convert CO to CH<sub>4</sub> prior to quantification by the thermally conductivity detector. H<sub>2</sub> was simultaneously monitored by a flame ionization detector during the same injection. The GC was precalibrated for CO and H<sub>2</sub> sensitivity by mimicking bulk electrolysis conditions (i.e. 5 mL supporting electrolyte in the same cell, with electrodes, under 1 atm CO<sub>2</sub>). Standard

curves for H<sub>2</sub> and CO were generated using this cell where known volumes of the analyte gas (H<sub>2</sub> or CO) were injected and the solution stirred for 15 min to allow equilibration of the analyte between the electrolyte and headspace prior to GC injection.

### Electrochemical data

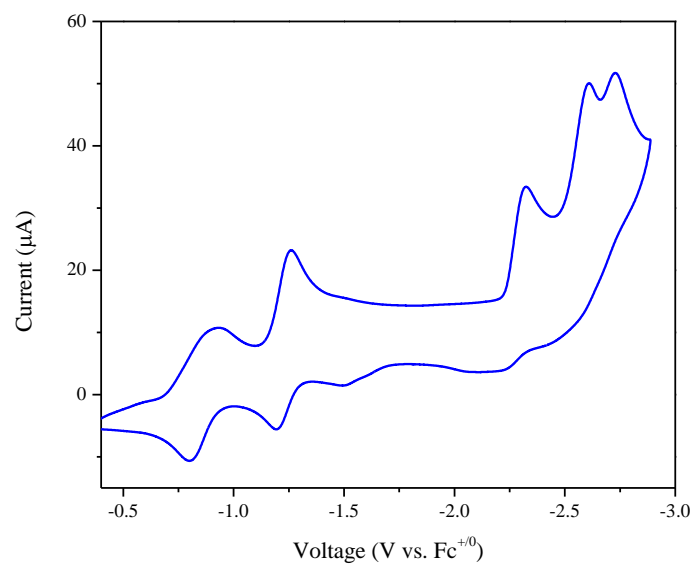

**Figure ESI-1.** Cyclic voltammetry of Ni(NNN)Cl<sub>2</sub> recorded under 1 atm Ar at 100 mV s<sup>-1</sup> at glassy carbon in a 0.1 M Bu<sub>4</sub>NPF<sub>6</sub> acetonitrile supporting electrolyte.

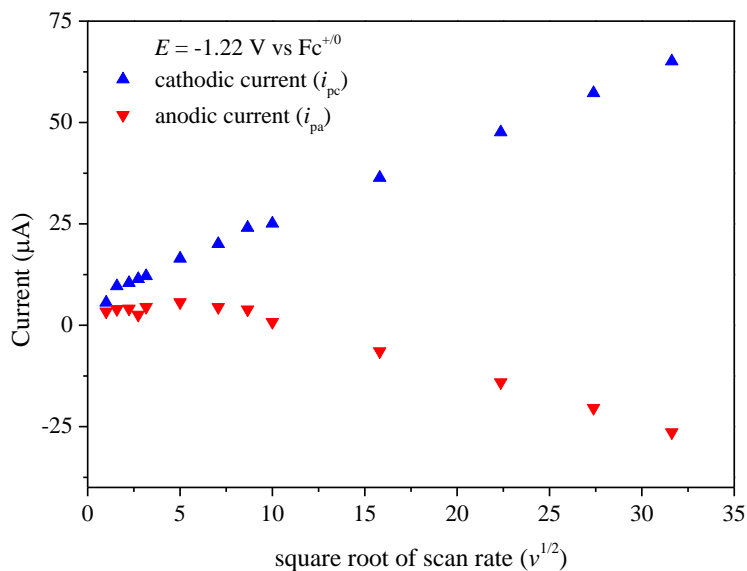

**Figure ESI-2.** Plot of cathodic and anodic currents versus the square root of the scan rate illustrating the irreversible nature of the anodic wave for the second redox wave of Ni(NNN)Br<sub>2</sub>, i.e. Ni(NNN)Br + e<sup>-</sup> → [Ni(NNN)Br]<sup>-</sup> → Ni(NNN) + Br<sup>-</sup>.

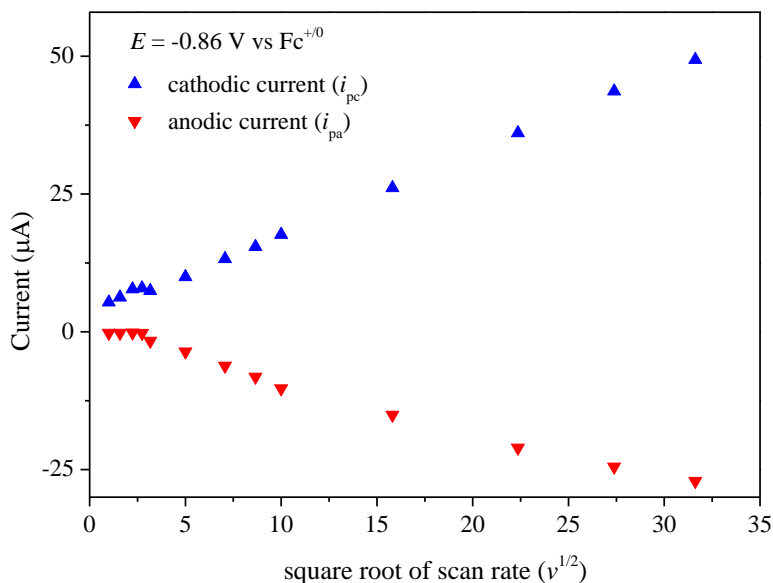

**Figure ESI-3.** Plot of cathodic and anodic currents versus the square root of the scan rate illustrating the irreversible nature of the anodic wave for the second redox wave of Ni(NNN)Br<sub>2</sub>, i.e. Ni(NNN)Br + e<sup>-</sup> → [Ni(NNN)Br]<sup>-</sup> → Ni(NNN) + Br<sup>-</sup>.

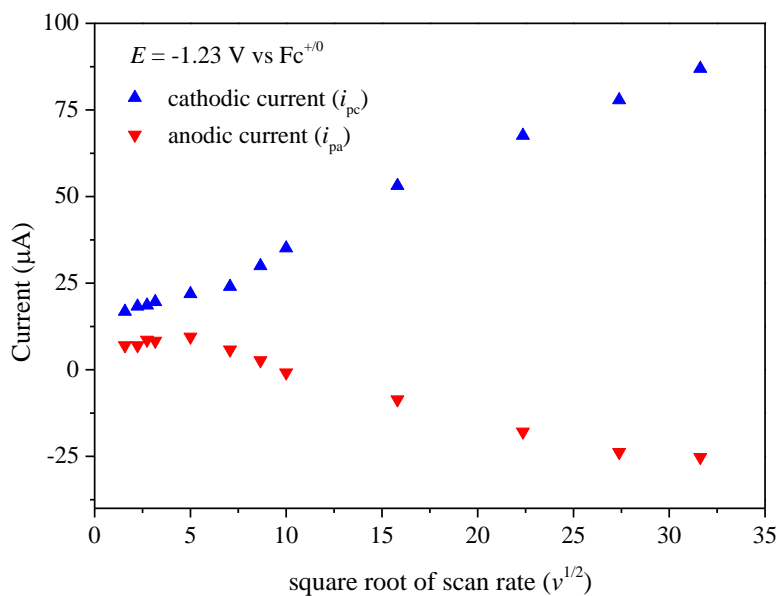

**Figure ESI-4.** Plot of cathodic and anodic currents versus the square root of the scan rate illustrating the irreversible nature of the anodic wave for the second redox wave of  $\text{Ni}(\text{NNN})\text{Cl}_2$ , i.e.  $\text{Ni}(\text{NNN})\text{Cl} + \text{e}^- \rightarrow [\text{Ni}(\text{NNN})\text{Cl}]^- \rightarrow \text{Ni}(\text{NNN}) + \text{Cl}^-$ .

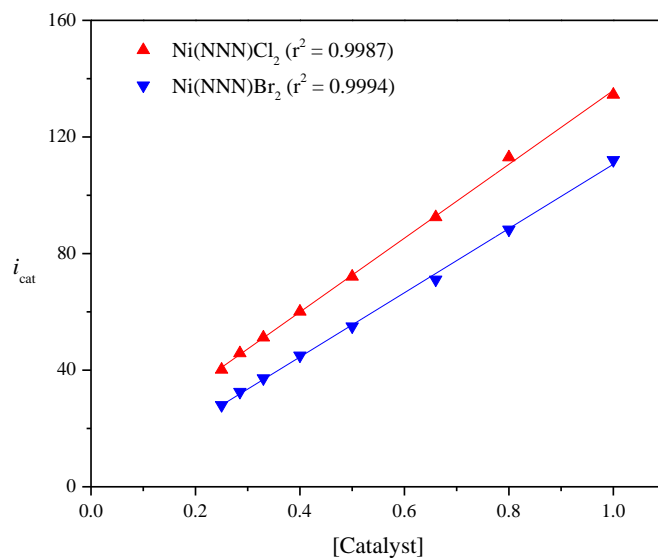

**Figure ESI-5.** Linear plot of catalytic current versus catalyst concentration.

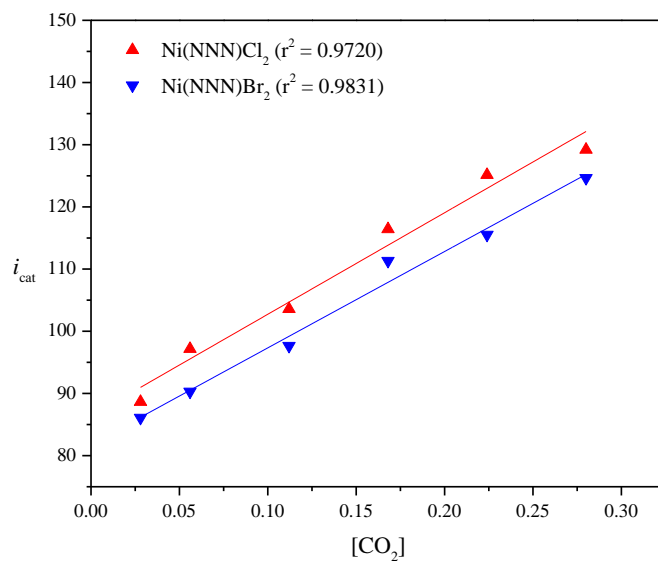

**Figure ESI-6.** Linear plot of catalytic current versus  $CO_2$  concentration.

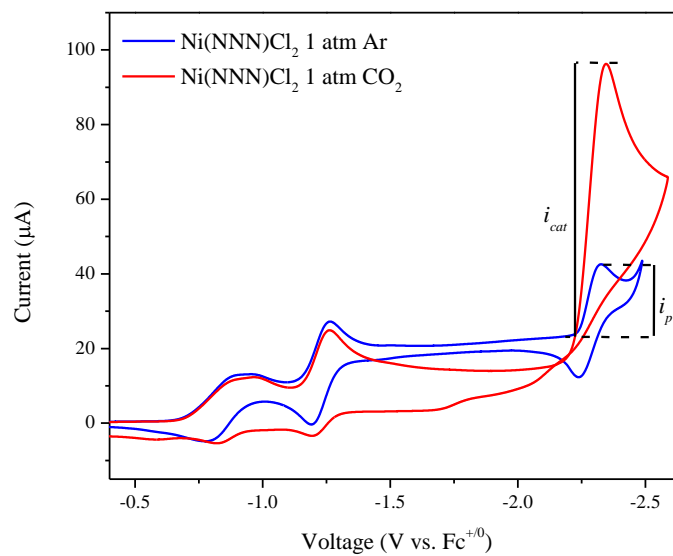

**Figure ESI-7.** Cyclic voltammetry of  $Ni(NNN)Cl_2$  recorded under 1 atm Ar and 1 atm  $CO_2$  at 100  $mV s^{-1}$  at glassy carbon in a 0.1 M  $Bu_4NPF_6$  acetonitrile supporting electrolyte.

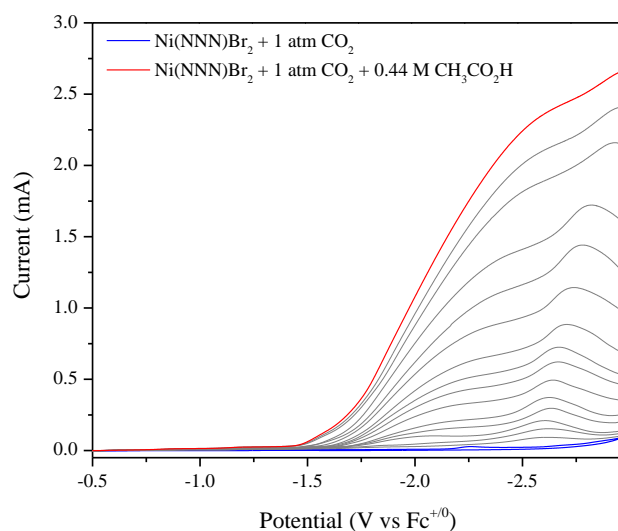

**Figure ESI-8.** Cyclic voltammetry of Ni(NNN)Br<sub>2</sub> recorded under 1 atm Ar and 1 atm CO<sub>2</sub> with incremental acetic acid concentrations (100 mV/s; 3 mm glassy carbon disc working electrode in a 0.1 M Bu<sub>4</sub>NPF<sub>6</sub> acetonitrile supporting electrolyte).

### Computational analysis

All theoretical calculations were carried out using density functional theory (DFT) with the B3LYP functional and acetonitrile polarizable continuum model (PCM)<sup>3</sup> as implemented in the Gaussian 09 B.01 program package.<sup>4</sup> The LANL08 relativistic effective core potential (RECP) basis set<sup>5</sup> was used for Ni and 6-311G(d,p)<sup>6,7</sup> for C, H, N, Cl. A vibrational frequency analysis was carried out following geometry optimization to confirm the minimum-energy geometry and determine the zero-point energy for each species.<sup>8</sup>

**Table ESI-1.** Cartesian coordinates for Ni(NNN)Cl<sub>2</sub> (Energy = -2458.86597001 a.u.)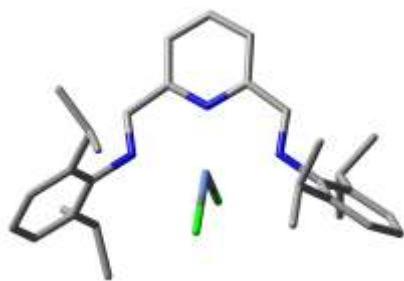

| Tag | Symbol | X          | Y          | Z          |
|-----|--------|------------|------------|------------|
| 1   | Ni     | 5.9630230  | 11.2310840 | 14.0594880 |
| 2   | Cl     | 4.2595260  | 9.8770310  | 14.6979440 |
| 3   | Cl     | 5.1946900  | 13.2637320 | 13.4718920 |
| 4   | N      | 7.4374490  | 9.9084200  | 14.2649500 |
| 5   | N      | 6.6690200  | 11.5464830 | 16.1370990 |
| 6   | C      | 7.7470810  | 9.0957380  | 13.2496330 |
| 7   | C      | 8.7071740  | 8.1031410  | 13.3737070 |
| 8   | H      | 8.8925720  | 7.5118910  | 12.6535770 |
| 9   | C      | 9.3907360  | 7.9949920  | 14.5765540 |
| 10  | H      | 10.0654440 | 7.3335460  | 14.6804220 |
| 11  | C      | 9.0928190  | 8.8493360  | 15.6275460 |
| 12  | H      | 9.5614220  | 8.7959750  | 16.4515440 |
| 13  | C      | 8.0760570  | 9.7945650  | 15.4310180 |
| 14  | C      | 7.6126300  | 10.7403640 | 16.4442830 |
| 15  | H      | 8.0030430  | 10.7563440 | 17.3102700 |
| 16  | C      | 6.1139160  | 12.3090870 | 17.2248710 |
| 17  | C      | 5.3858090  | 11.6345140 | 18.2264540 |
| 18  | C      | 4.8999050  | 12.3895560 | 19.2848650 |
| 19  | H      | 4.4231280  | 11.9562490 | 19.9827380 |
| 20  | C      | 5.0940220  | 13.7628120 | 19.3483230 |
| 21  | H      | 4.7623210  | 14.2590390 | 20.0885000 |
| 22  | C      | 5.7748590  | 14.4065660 | 18.3255870 |
| 23  | H      | 5.8752550  | 15.3505110 | 18.3521060 |
| 24  | C      | 6.3132090  | 13.6901900 | 17.2594410 |
| 25  | C      | 7.1929300  | 14.3831680 | 16.2273910 |
| 26  | H      | 7.2047820  | 13.8167440 | 15.4033930 |
| 27  | C      | 6.6770580  | 15.7618460 | 15.8395440 |
| 28  | H      | 5.7649150  | 15.6829460 | 15.4886340 |
| 29  | H      | 7.2592700  | 16.1466430 | 15.1524050 |
| 30  | H      | 6.6748780  | 16.3435360 | 16.6283400 |
| 31  | C      | 8.6263940  | 14.4616390 | 16.7675680 |
| 32  | H      | 8.6296640  | 14.9581520 | 17.6133490 |
| 33  | H      | 9.1963470  | 14.9210560 | 16.1168930 |



|    |   |           |            |            |
|----|---|-----------|------------|------------|
| 34 | H | 8.9688560 | 13.5556470 | 16.9187920 |
| 35 | C | 5.1005600 | 10.1386990 | 18.1784670 |
| 36 | H | 5.4175490 | 9.7947070  | 17.2944840 |
| 37 | C | 5.8587720 | 9.3943590  | 19.2695530 |
| 38 | H | 6.8206360 | 9.5407440  | 19.1571610 |
| 39 | H | 5.6654730 | 8.4364320  | 19.2060960 |
| 40 | H | 5.5782910 | 9.7276500  | 20.1469060 |
| 41 | C | 3.5992580 | 9.8554870  | 18.2818610 |
| 42 | H | 3.2625170 | 10.1856400 | 19.1413760 |
| 43 | H | 3.4436920 | 8.8901420  | 18.2195090 |
| 44 | H | 3.1303820 | 10.3097680 | 17.5517860 |
| 45 | C | 7.0518040 | 9.4488610  | 11.9975350 |
| 46 | H | 7.1952460 | 8.9543460  | 11.1997410 |
| 47 | N | 6.2509550 | 10.4407440 | 12.0229500 |
| 48 | C | 5.7512930 | 10.9373990 | 10.7634330 |
| 49 | C | 4.4547320 | 10.6041080 | 10.3574320 |
| 50 | C | 3.5628860 | 9.6978300  | 11.1763790 |
| 51 | H | 4.0239980 | 9.5236230  | 12.0474170 |
| 52 | C | 3.3633210 | 8.3465460  | 10.4774010 |
| 53 | H | 2.9410330 | 8.4892220  | 9.6038370  |
| 54 | H | 2.7884640 | 7.7758420  | 11.0276800 |
| 55 | H | 4.2324180 | 7.9113840  | 10.3520650 |
| 56 | C | 2.2270930 | 10.3521430 | 11.4848260 |
| 57 | H | 2.3784360 | 11.1943590 | 11.9621760 |
| 58 | H | 1.6905150 | 9.7519050  | 12.0442600 |
| 59 | H | 1.7504530 | 10.5309160 | 10.6472520 |
| 60 | C | 4.0220910 | 11.1141750 | 9.1346950  |
| 61 | H | 3.1426420 | 10.9132870 | 8.8350880  |
| 62 | C | 4.8365620 | 11.9040290 | 8.3457410  |
| 63 | H | 4.5239330 | 12.2216260 | 7.5059580  |
| 64 | C | 6.1091480 | 12.2314710 | 8.7815760  |
| 65 | H | 6.6626180 | 12.7809160 | 8.2384000  |
| 66 | C | 6.5932810 | 11.7664900 | 10.0065230 |
| 67 | C | 7.9951420 | 12.1270320 | 10.4608270 |
| 68 | H | 8.0929490 | 11.8221330 | 11.4081090 |
| 69 | C | 8.2590040 | 13.6276980 | 10.4319390 |
| 70 | H | 8.2346200 | 13.9465790 | 9.5059680  |
| 71 | H | 9.1404960 | 13.8124640 | 10.8177350 |
| 72 | H | 7.5712190 | 14.0906820 | 10.9550680 |
| 73 | C | 9.0405090 | 11.3882560 | 9.6275150  |
| 74 | H | 8.9293520 | 10.4224820 | 9.7474850  |
| 75 | H | 9.9373950 | 11.6523490 | 9.9195450  |

76 H 8.9252650 11.6152530 8.6819700

**Table ESI-2.** Cartesian coordinates for Ni(NNN)Cl (Energy = -1999.07797253 a.u.)

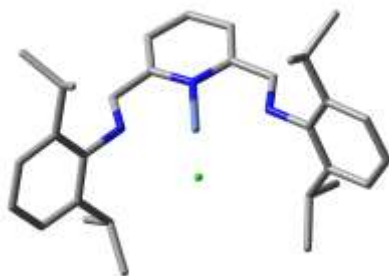

| Tag | Symbol | X          | Y          | Z          |
|-----|--------|------------|------------|------------|
| 1   | C      | 0.7694850  | -0.3365770 | 0.2316810  |
| 2   | C      | 1.5188510  | 0.8373950  | 0.2091220  |
| 3   | C      | 0.8526760  | 2.0634860  | 0.1767130  |
| 4   | C      | -0.5428290 | 2.0818580  | 0.1654800  |
| 5   | C      | -1.2335920 | 0.8723650  | 0.1895250  |
| 6   | H      | 2.6008120  | 0.7892400  | 0.2159490  |
| 7   | H      | 1.4121990  | 2.9897330  | 0.1585200  |
| 8   | H      | -1.0888970 | 3.0168250  | 0.1376500  |
| 9   | C      | -2.6852020 | 0.7345070  | 0.1719000  |
| 10  | H      | -3.3064470 | 1.6295500  | 0.1624030  |
| 11  | C      | 1.3236280  | -1.6853670 | 0.2559200  |
| 12  | H      | 2.4048050  | -1.8181660 | 0.2801130  |
| 13  | C      | -4.5993070 | -0.6248040 | 0.1661740  |
| 14  | C      | -5.3275670 | -0.4736510 | 1.3639140  |
| 15  | C      | -5.2268310 | -1.0008800 | -1.0405510 |
| 16  | C      | -6.7144900 | -0.6552420 | 1.3113670  |
| 17  | C      | -6.6137490 | -1.1636750 | -1.0377580 |
| 18  | C      | -7.3571690 | -0.9859990 | 0.1251760  |
| 19  | H      | -7.2986240 | -0.5374290 | 2.2172620  |
| 20  | H      | -7.1213770 | -1.4322330 | -1.9567280 |
| 21  | H      | -8.4336470 | -1.1146180 | 0.1072910  |
| 22  | C      | 1.0147500  | -4.0117990 | 0.2777880  |
| 23  | C      | 1.4105170  | -4.5817380 | 1.5047470  |
| 24  | C      | 1.0537850  | -4.7429060 | -0.9284220 |
| 25  | C      | 1.8994390  | -5.8929380 | 1.4863690  |
| 26  | C      | 1.5531050  | -6.0465620 | -0.8899410 |
| 27  | C      | 1.9806240  | -6.6185750 | 0.3044710  |
| 28  | H      | 2.2193090  | -6.3529340 | 2.4146150  |
| 29  | H      | 1.6090470  | -6.6240280 | -1.8051250 |
| 30  | H      | 2.3672090  | -7.6315760 | 0.3139800  |
| 31  | C      | -4.4181700 | -1.1821670 | -2.3204800 |

|    |    |            |            |            |
|----|----|------------|------------|------------|
| 32 | H  | -3.3765330 | -1.3321640 | -2.0239970 |
| 33 | C  | -4.6595460 | -0.1548950 | 2.6987880  |
| 34 | H  | -3.5795650 | -0.1477720 | 2.5435480  |
| 35 | C  | -4.4721200 | 0.0864530  | -3.1944200 |
| 36 | H  | -5.4967410 | 0.2890280  | -3.5211750 |
| 37 | H  | -4.1151650 | 0.9647150  | -2.6500480 |
| 38 | H  | -3.8501730 | -0.0353680 | -4.0862430 |
| 39 | C  | -4.8401110 | -2.4207780 | -3.1275410 |
| 40 | H  | -4.8118980 | -3.3230120 | -2.5113980 |
| 41 | H  | -5.8488230 | -2.3198490 | -3.5372920 |
| 42 | H  | -4.1586260 | -2.5639590 | -3.9707180 |
| 43 | C  | -5.0607290 | 1.2373070  | 3.2209740  |
| 44 | H  | -4.8057560 | 2.0218580  | 2.5035070  |
| 45 | H  | -6.1368100 | 1.2941060  | 3.4095350  |
| 46 | H  | -4.5442230 | 1.4559750  | 4.1601850  |
| 47 | C  | -4.9485820 | -1.2433440 | 3.7497030  |
| 48 | H  | -4.6518860 | -2.2294200 | 3.3837060  |
| 49 | H  | -4.3905010 | -1.0383620 | 4.6678870  |
| 50 | H  | -6.0102340 | -1.2839780 | 4.0085230  |
| 51 | C  | 0.6046330  | -4.1107740 | -2.2415340 |
| 52 | H  | -0.0481240 | -3.2711120 | -1.9875210 |
| 53 | C  | 1.8062280  | -3.5408770 | -3.0210410 |
| 54 | H  | 1.4696700  | -3.0456510 | -3.9367330 |
| 55 | H  | 2.3609600  | -2.8109180 | -2.4257950 |
| 56 | H  | 2.5001600  | -4.3388280 | -3.3028960 |
| 57 | C  | -0.2141770 | -5.0672400 | -3.1234230 |
| 58 | H  | 0.3899470  | -5.8971580 | -3.5003130 |
| 59 | H  | -1.0613630 | -5.4852460 | -2.5740710 |
| 60 | H  | -0.6048290 | -4.5287850 | -3.9913640 |
| 61 | C  | 1.3083570  | -3.8278210 | 2.8281500  |
| 62 | H  | 0.7890160  | -2.8867420 | 2.6392730  |
| 63 | C  | 2.6995760  | -3.4828820 | 3.3932300  |
| 64 | H  | 3.2708050  | -4.3889790 | 3.6158970  |
| 65 | H  | 3.2823070  | -2.8868750 | 2.6858170  |
| 66 | H  | 2.6036270  | -2.9104840 | 4.3205000  |
| 67 | C  | 0.4697870  | -4.5973480 | 3.8656600  |
| 68 | H  | -0.5295520 | -4.8159840 | 3.4812390  |
| 69 | H  | 0.9398700  | -5.5441080 | 4.1455050  |
| 70 | H  | 0.3599300  | -4.0006730 | 4.7758360  |
| 71 | Ni | -1.5799600 | -1.9625010 | 0.2806630  |
| 72 | N  | 0.5032120  | -2.6763240 | 0.2422790  |
| 73 | N  | -0.5826070 | -0.3124590 | 0.2270200  |

|    |    |            |            |           |
|----|----|------------|------------|-----------|
| 74 | N  | -3.1795460 | -0.4534500 | 0.1632280 |
| 75 | Cl | -2.7433210 | -3.9100390 | 0.6153820 |

**Table ESI-3.** Cartesian coordinates for [Ni(NNN)Cl]<sup>-</sup> (Energy = -1999.18106236 a.u.)

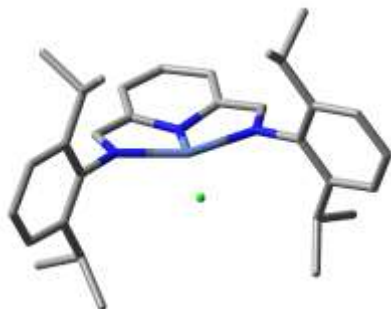

| Tag | Symbol | X          | Y          | Z          |
|-----|--------|------------|------------|------------|
| 1   | C      | 0.8518380  | -0.2282840 | 0.3217830  |
| 2   | C      | 1.5672660  | 0.9420750  | 0.0941200  |
| 3   | C      | 0.8879630  | 2.1664960  | -0.0004250 |
| 4   | C      | -0.5147550 | 2.1804040  | 0.0273170  |
| 5   | C      | -1.2129730 | 0.9995090  | 0.2558400  |
| 6   | H      | 2.6410550  | 0.8929450  | -0.0509000 |
| 7   | H      | 1.4374810  | 3.0802420  | -0.1906460 |
| 8   | H      | -1.0624230 | 3.0956760  | -0.1697020 |
| 9   | C      | -2.5942190 | 0.7612380  | 0.1558960  |
| 10  | H      | -3.3329830 | 1.5536700  | 0.0921620  |
| 11  | C      | 1.3050120  | -1.5580690 | 0.2749280  |
| 12  | H      | 2.3555660  | -1.8300330 | 0.2629810  |
| 13  | C      | -4.3554210 | -0.8130650 | 0.1778160  |
| 14  | C      | -5.0978000 | -0.7426700 | 1.3781280  |
| 15  | C      | -4.9863610 | -1.1450380 | -1.0421540 |
| 16  | C      | -6.4750570 | -0.9841170 | 1.3266040  |
| 17  | C      | -6.3656630 | -1.3736070 | -1.0427280 |
| 18  | C      | -7.1102800 | -1.2918270 | 0.1291340  |
| 19  | H      | -7.0598610 | -0.9281560 | 2.2384920  |
| 20  | H      | -6.8663300 | -1.6161310 | -1.9736320 |
| 21  | H      | -8.1801180 | -1.4700220 | 0.1091960  |
| 22  | C      | 0.7625380  | -3.8564720 | 0.3082340  |
| 23  | C      | 1.1404800  | -4.4601960 | 1.5285410  |
| 24  | C      | 0.8103000  | -4.5836160 | -0.9025020 |
| 25  | C      | 1.5821000  | -5.7877520 | 1.5074000  |
| 26  | C      | 1.2604590  | -5.9066870 | -0.8719400 |
| 27  | C      | 1.6474440  | -6.5086970 | 0.3207970  |
| 28  | H      | 1.8804160  | -6.2645450 | 2.4350110  |
| 29  | H      | 1.3129550  | -6.4742530 | -1.7944670 |
| 30  | H      | 1.9964170  | -7.5357930 | 0.3252040  |

|    |    |            |            |            |
|----|----|------------|------------|------------|
| 31 | C  | -4.1963040 | -1.2201970 | -2.3438010 |
| 32 | H  | -3.1400770 | -1.2475620 | -2.0688820 |
| 33 | C  | -4.4406100 | -0.4096580 | 2.7140300  |
| 34 | H  | -3.3610280 | -0.4180200 | 2.5542620  |
| 35 | C  | -4.4205910 | 0.0387090  | -3.2040580 |
| 36 | H  | -5.4704780 | 0.1295740  | -3.5008850 |
| 37 | H  | -4.1457230 | 0.9450860  | -2.6583150 |
| 38 | H  | -3.8157160 | -0.0043500 | -4.1153350 |
| 39 | C  | -4.4986690 | -2.4944960 | -3.1501900 |
| 40 | H  | -4.3465790 | -3.3911350 | -2.5438770 |
| 41 | H  | -5.5269420 | -2.5095440 | -3.5233970 |
| 42 | H  | -3.8352460 | -2.5560950 | -4.0179880 |
| 43 | C  | -4.8315710 | 0.9988360  | 3.2012390  |
| 44 | H  | -4.5604800 | 1.7628200  | 2.4681220  |
| 45 | H  | -5.9094790 | 1.0702440  | 3.3779680  |
| 46 | H  | -4.3215250 | 1.2349310  | 4.1403650  |
| 47 | C  | -4.7493300 | -1.4626620 | 3.7941560  |
| 48 | H  | -4.4739390 | -2.4650100 | 3.4574080  |
| 49 | H  | -4.1850450 | -1.2434060 | 4.7056420  |
| 50 | H  | -5.8105460 | -1.4750560 | 4.0594570  |
| 51 | C  | 0.4231490  | -3.9355400 | -2.2271540 |
| 52 | H  | -0.1045800 | -3.0113160 | -1.9830740 |
| 53 | C  | 1.6741040  | -3.5563600 | -3.0440610 |
| 54 | H  | 1.3896810  | -3.0429350 | -3.9679620 |
| 55 | H  | 2.3318400  | -2.8927020 | -2.4769190 |
| 56 | H  | 2.2487940  | -4.4472550 | -3.3175860 |
| 57 | C  | -0.5294510 | -4.8062920 | -3.0639610 |
| 58 | H  | -0.0499600 | -5.7295000 | -3.4025010 |
| 59 | H  | -1.4215150 | -5.0782500 | -2.4940440 |
| 60 | H  | -0.8515640 | -4.2593940 | -3.9550960 |
| 61 | C  | 1.0776990  | -3.7075600 | 2.8539780  |
| 62 | H  | 0.5809010  | -2.7553780 | 2.6621480  |
| 63 | C  | 2.4855520  | -3.3975920 | 3.3979810  |
| 64 | H  | 3.0397360  | -4.3173240 | 3.6104930  |
| 65 | H  | 3.0681920  | -2.8124940 | 2.6817200  |
| 66 | H  | 2.4189420  | -2.8245080 | 4.3280090  |
| 67 | C  | 0.2393690  | -4.4552170 | 3.9070090  |
| 68 | H  | -0.7658640 | -4.6639020 | 3.5329350  |
| 69 | H  | 0.6990160  | -5.4062080 | 4.1918160  |
| 70 | H  | 0.1457810  | -3.8497020 | 4.8136020  |
| 71 | Ni | -1.4511400 | -1.7423020 | 0.4539570  |
| 72 | N  | 0.3394820  | -2.4910270 | 0.2791250  |

|    |    |            |            |           |
|----|----|------------|------------|-----------|
| 73 | N  | -0.5178470 | -0.1656550 | 0.5916060 |
| 74 | N  | -2.9537720 | -0.5327660 | 0.1819100 |
| 75 | Cl | -2.6227870 | -3.7106750 | 0.7372960 |

**Table ESI-4.** Cartesian coordinates for Ni(NNN) (Energy = -1538.75041850 a.u.)

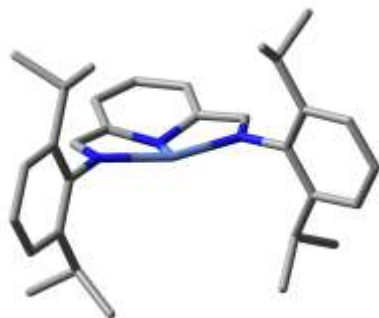

| Tag | Symbol | X          | Y          | Z          |
|-----|--------|------------|------------|------------|
| 1   | C      | 0.9325260  | -0.1256050 | 0.2282580  |
| 2   | C      | 1.6399960  | 1.0251620  | -0.1032570 |
| 3   | C      | 0.9624660  | 2.2457400  | -0.2319320 |
| 4   | C      | -0.4366710 | 2.2707410  | -0.1527720 |
| 5   | C      | -1.1307370 | 1.1115350  | 0.1792290  |
| 6   | H      | 2.7023870  | 0.9587750  | -0.3092160 |
| 7   | H      | 1.5064790  | 3.1421470  | -0.5017180 |
| 8   | H      | -0.9876900 | 3.1722120  | -0.3961830 |
| 9   | C      | -2.5175630 | 0.8520730  | 0.0924630  |
| 10  | H      | -3.2690160 | 1.6320660  | 0.0228560  |
| 11  | C      | 1.3577700  | -1.4733040 | 0.1794490  |
| 12  | H      | 2.4010340  | -1.7708730 | 0.1478140  |
| 13  | C      | -4.2295020 | -0.8180530 | 0.1987160  |
| 14  | C      | -4.8751570 | -0.8637410 | 1.4553960  |
| 15  | C      | -4.9120780 | -1.1764450 | -0.9859850 |
| 16  | C      | -6.2181430 | -1.2537860 | 1.4955720  |
| 17  | C      | -6.2556890 | -1.5501090 | -0.8910840 |
| 18  | C      | -6.9080820 | -1.5890530 | 0.3366150  |
| 19  | H      | -6.7328960 | -1.2925790 | 2.4492560  |
| 20  | H      | -6.8007890 | -1.8149380 | -1.7903070 |
| 21  | H      | -7.9506670 | -1.8829270 | 0.3897160  |
| 22  | C      | 0.6839550  | -3.7680960 | 0.2811040  |
| 23  | C      | 0.8555110  | -4.3672760 | 1.5493320  |
| 24  | C      | 0.7771420  | -4.5304730 | -0.9054620 |
| 25  | C      | 1.1435500  | -5.7353160 | 1.6013210  |
| 26  | C      | 1.0756300  | -5.8918170 | -0.7980830 |
| 27  | C      | 1.2595210  | -6.4937640 | 0.4422680  |
| 28  | H      | 1.2839030  | -6.2132460 | 2.5646220  |
| 29  | H      | 1.1654670  | -6.4905440 | -1.6976690 |

|    |    |            |            |            |
|----|----|------------|------------|------------|
| 30 | H  | 1.4901900  | -7.5515940 | 0.5049070  |
| 31 | C  | -4.2255070 | -1.1309750 | -2.3463900 |
| 32 | H  | -3.1602940 | -0.9781110 | -2.1633020 |
| 33 | C  | -4.1560440 | -0.5073740 | 2.7528860  |
| 34 | H  | -3.1125340 | -0.3056770 | 2.5075080  |
| 35 | C  | -4.7293610 | 0.0580530  | -3.1869150 |
| 36 | H  | -5.7966600 | -0.0392550 | -3.4087410 |
| 37 | H  | -4.5807200 | 1.0055940  | -2.6625420 |
| 38 | H  | -4.1916350 | 0.1093170  | -4.1384770 |
| 39 | C  | -4.3722380 | -2.4529990 | -3.1198520 |
| 40 | H  | -3.9980170 | -3.2968230 | -2.5339210 |
| 41 | H  | -5.4139110 | -2.6598380 | -3.3812030 |
| 42 | H  | -3.8015610 | -2.4094550 | -4.0520870 |
| 43 | C  | -4.7365970 | 0.7692010  | 3.3897770  |
| 44 | H  | -4.6849480 | 1.6144590  | 2.6984160  |
| 45 | H  | -5.7839890 | 0.6322090  | 3.6752180  |
| 46 | H  | -4.1763330 | 1.0339030  | 4.2915390  |
| 47 | C  | -4.1675490 | -1.6778920 | 3.7532990  |
| 48 | H  | -3.7237960 | -2.5753430 | 3.3140720  |
| 49 | H  | -3.5914970 | -1.4183880 | 4.6463860  |
| 50 | H  | -5.1830210 | -1.9272500 | 4.0740710  |
| 51 | C  | 0.5864400  | -3.8938780 | -2.2775250 |
| 52 | H  | 0.1978120  | -2.8871510 | -2.1122190 |
| 53 | C  | 1.9279500  | -3.7584870 | -3.0234620 |
| 54 | H  | 1.7827880  | -3.2536440 | -3.9833250 |
| 55 | H  | 2.6487180  | -3.1781680 | -2.4416330 |
| 56 | H  | 2.3699190  | -4.7396310 | -3.2232960 |
| 57 | C  | -0.4450330 | -4.6479510 | -3.1350310 |
| 58 | H  | -0.1112780 | -5.6602840 | -3.3798180 |
| 59 | H  | -1.4062940 | -4.7256000 | -2.6200590 |
| 60 | H  | -0.6089040 | -4.1185640 | -4.0781650 |
| 61 | C  | 0.7387920  | -3.5699860 | 2.8443580  |
| 62 | H  | 0.4191950  | -2.5604630 | 2.5814290  |
| 63 | C  | 2.0978730  | -3.4528860 | 3.5601600  |
| 64 | H  | 2.4753080  | -4.4347260 | 3.8617700  |
| 65 | H  | 2.8472500  | -2.9895820 | 2.9129360  |
| 66 | H  | 2.0024890  | -2.8395830 | 4.4611990  |
| 67 | C  | -0.3309560 | -4.1535800 | 3.7855520  |
| 68 | H  | -1.3035040 | -4.2111140 | 3.2894010  |
| 69 | H  | -0.0670650 | -5.1587080 | 4.1268660  |
| 70 | H  | -0.4402850 | -3.5210110 | 4.6712980  |
| 71 | Ni | -1.3468990 | -1.5817160 | 0.3503330  |

|    |   |            |            |           |
|----|---|------------|------------|-----------|
| 72 | N | 0.3722660  | -2.3762630 | 0.1893380 |
| 73 | N | -0.4190250 | -0.0257330 | 0.5855070 |
| 74 | N | -2.8526290 | -0.4421630 | 0.1202570 |

**Table ESI-5.** Cartesian coordinates for [Ni(NNN)]<sup>-</sup> (Energy = -1538.85497864 a.u.)

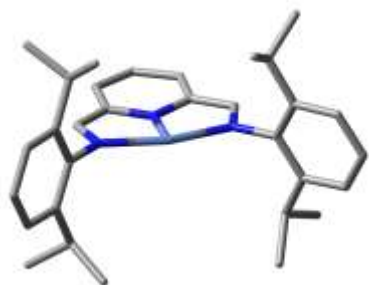

| Tag | Symbol | X          | Y          | Z          |
|-----|--------|------------|------------|------------|
| 1   | C      | 0.9024310  | -0.2002010 | -0.1389320 |
| 2   | C      | 1.6373610  | 0.9843600  | -0.2320140 |
| 3   | C      | 0.9448200  | 2.2087300  | -0.3086910 |
| 4   | C      | -0.4618920 | 2.2551730  | -0.2531910 |
| 5   | C      | -1.1710150 | 1.0554700  | -0.1589200 |
| 6   | H      | 2.7230160  | 0.9669360  | -0.2260560 |
| 7   | H      | 1.5057840  | 3.1345930  | -0.3776330 |
| 8   | H      | -0.9808530 | 3.2088960  | -0.2633090 |
| 9   | C      | -2.5643990 | 0.8283110  | -0.0178540 |
| 10  | H      | -3.3000930 | 1.6264260  | -0.0378230 |
| 11  | C      | 1.3448080  | -1.5395180 | 0.0141370  |
| 12  | H      | 2.3927050  | -1.8227700 | 0.0060450  |
| 13  | C      | -4.3409810 | -0.7269450 | 0.2518340  |
| 14  | C      | -4.9403110 | -0.7673900 | 1.5366080  |
| 15  | C      | -5.1245340 | -0.9724080 | -0.9052070 |
| 16  | C      | -6.3082450 | -1.0494800 | 1.6368870  |
| 17  | C      | -6.4876080 | -1.2545160 | -0.7528640 |
| 18  | C      | -7.0837510 | -1.2917790 | 0.5053580  |
| 19  | H      | -6.7756610 | -1.0789670 | 2.6160320  |
| 20  | H      | -7.0933930 | -1.4470890 | -1.6328530 |
| 21  | H      | -8.1423060 | -1.5087220 | 0.6034360  |
| 22  | C      | 0.7869800  | -3.8415260 | 0.2601540  |
| 23  | C      | 0.8847620  | -4.4544520 | 1.5460350  |
| 24  | C      | 1.0770260  | -4.6011160 | -0.9177960 |
| 25  | C      | 1.2708240  | -5.8074870 | 1.6310060  |
| 26  | C      | 1.4613830  | -5.9505160 | -0.7821890 |
| 27  | C      | 1.5624760  | -6.5586920 | 0.4798610  |
| 28  | H      | 1.3511080  | -6.2783910 | 2.6066940  |
| 29  | H      | 1.6830690  | -6.5334130 | -1.6717500 |



|    |    |            |            |            |
|----|----|------------|------------|------------|
| 30 | H  | 1.8622670  | -7.5988970 | 0.5647430  |
| 31 | C  | -4.5102550 | -0.9537420 | -2.3011300 |
| 32 | H  | -3.4578810 | -0.6938940 | -2.1815510 |
| 33 | C  | -4.1259290 | -0.5078790 | 2.7996660  |
| 34 | H  | -3.0804740 | -0.4463160 | 2.4922920  |
| 35 | C  | -5.1560670 | 0.1123410  | -3.2046840 |
| 36 | H  | -6.2141550 | -0.0993340 | -3.3880990 |
| 37 | H  | -5.0865020 | 1.1055660  | -2.7525940 |
| 38 | H  | -4.6515690 | 0.1468440  | -4.1754110 |
| 39 | C  | -4.5660790 | -2.3440740 | -2.9607840 |
| 40 | H  | -4.0521140 | -3.0878900 | -2.3455070 |
| 41 | H  | -5.5976130 | -2.6798420 | -3.1056040 |
| 42 | H  | -4.0804300 | -2.3237430 | -3.9415380 |
| 43 | C  | -4.5040290 | 0.8353330  | 3.4521850  |
| 44 | H  | -4.3686140 | 1.6641780  | 2.7523710  |
| 45 | H  | -5.5487010 | 0.8387450  | 3.7800050  |
| 46 | H  | -3.8776770 | 1.0271950  | 4.3292950  |
| 47 | C  | -4.2393620 | -1.6606490 | 3.8132830  |
| 48 | H  | -3.9407110 | -2.6110110 | 3.3625150  |
| 49 | H  | -3.5877590 | -1.4764420 | 4.6730810  |
| 50 | H  | -5.2601060 | -1.7734040 | 4.1910120  |
| 51 | C  | 0.9659470  | -3.9886720 | -2.3121970 |
| 52 | H  | 0.5588900  | -2.9851290 | -2.1876680 |
| 53 | C  | 2.3429090  | -3.8527230 | -2.9890670 |
| 54 | H  | 2.2447350  | -3.3678730 | -3.9656940 |
| 55 | H  | 3.0219920  | -3.2502100 | -2.3801080 |
| 56 | H  | 2.8095500  | -4.8305940 | -3.1473510 |
| 57 | C  | -0.0116850 | -4.7691520 | -3.2098100 |
| 58 | H  | 0.3368750  | -5.7881990 | -3.4036390 |
| 59 | H  | -1.0008940 | -4.8336590 | -2.7480280 |
| 60 | H  | -0.1229310 | -4.2682990 | -4.1766090 |
| 61 | C  | 0.5922330  | -3.6730000 | 2.8237160  |
| 62 | H  | 0.2525300  | -2.6828730 | 2.5157510  |
| 63 | C  | 1.8573150  | -3.4915390 | 3.6830270  |
| 64 | H  | 2.2483210  | -4.4540330 | 4.0284650  |
| 65 | H  | 2.6486190  | -2.9920160 | 3.1175030  |
| 66 | H  | 1.6381580  | -2.8837890 | 4.5667910  |
| 67 | C  | -0.5429480 | -4.3120870 | 3.6436270  |
| 68 | H  | -1.4551500 | -4.3988810 | 3.0466020  |
| 69 | H  | -0.2755160 | -5.3126320 | 3.9974960  |
| 70 | H  | -0.7719500 | -3.7003200 | 4.5218780  |
| 71 | Ni | -1.4378570 | -1.7218230 | 0.1298410  |

|    |   |            |            |            |
|----|---|------------|------------|------------|
| 72 | N | 0.3684350  | -2.4813180 | 0.1520120  |
| 73 | N | -0.4691360 | -0.1257470 | -0.1698530 |
| 74 | N | -2.9466290 | -0.4726370 | 0.1236010  |

## References

1. Reed, B. R.; Stoian, S. A.; Lord, R. L.; Groysman, S., *Chem. Comm.* **2015**, *51*, 6496-6499.
2. Connelly, N. G.; Geiger, W. E., *Chem. Rev.* **1996**, *96*, 877-910.
3. Tomasi, J.; Mennucci, B.; Cammi, R., *Chem. Rev.* **2005**, *105*, 2999-3093.
4. Gaussian 09, Revision B.01, M. J. Frisch, G. W. Trucks, H. B. Schlegel, G. E. Scuseria, M. A. Robb, J. R. Cheeseman, G. Scalmani, V. Barone, B. Mennucci, G. A. Petersson, H. Nakatsuji, M. Caricato, X. Li, H. P. Hratchian, A. F. Izmaylov, J. Bloino, G. Zheng, J. L. Sonnenberg, M. Hada, M. Ehara, K. Toyota, R. Fukuda, J. Hasegawa, M. Ishida, T. Nakajima, Y. Honda, O. Kitao, H. Nakai, T. Vreven, J. A. Montgomery, Jr., J. E. Peralta, F. Ogliaro, M. Bearpark, J. J. Heyd, E. Brothers, K. N. Kudin, V. N. Staroverov, T. Keith, R. Kobayashi, J. Normand, K. Raghavachari, A. Rendell, J. C. Burant, S. S. Iyengar, J. Tomasi, M. Cossi, N. Rega, J. M. Millam, M. Klene, J. E. Knox, J. B. Cross, V. Bakken, C. Adamo, J. Jaramillo, R. Gomperts, R. E. Stratmann, O. Yazyev, A. J. Austin, R. Cammi, C. Pomelli, J. W. Ochterski, R. L. Martin, K. Morokuma, V. G. Zakrzewski, G. A. Voth, P. Salvador, J. J. Dannenberg, S. Dapprich, A. D. Daniels, O. Farkas, J. B. Foresman, J. V. Ortiz, J. Cioslowski, and D. J. Fox, Gaussian, Inc., Wallingford CT, 2010.
5. Roy, L. E.; Hay, P. J.; Martin, R. L., *J. Chem. Theory Comput.* **2008**, *4*, 1029-1031.
6. Harihara.Pc; Pople, J. A., *Theor. Chim. Acta* **1973**, *28*, 213-222.
7. Francl, M. M.; Pietro, W. J.; Hehre, W. J.; Binkley, J. S.; Gordon, M. S.; Defrees, D. J.; Pople, J. A., *J. Chem. Phys.* **1982**, *77*, 3654-3665.
8. Scalmani, G.; Frisch, M. J.; Mennucci, B.; Tomasi, J.; Cammi, R.; Barone, V., *J. Chem. Phys.* **2006**, *124*, 94107.
